# Supplementary material for: N-doped carbon nanowire array confined cobalt phosphides as efficient bifunctional electrocatalysts for water splitting
Source: Royal Society of Chemistry journal article supplement (doi:10.1039/d3qi00093a), 2023-01-01
Supplement: d3qi00093a1.pdf [file d3qi00093a1.pdf]

## Supporting Information

### **N-doped Carbon Nanowire Arrays Encapsulated Cobalt Phosphides as a Highly Efficient Bifunctional Electroactivity for Hydrogen and Oxygen Evolution**

*Shunlian Ning*<sup>a, b, #</sup>, *Qikai Wu*<sup>c, #</sup>, *Yuguang Zhu*<sup>c</sup>, *Shilong Liu*<sup>c</sup>, *Wei Zhou*<sup>c</sup>, *Luo Mi*<sup>c</sup>, *Kai Zhou*<sup>d</sup>,  
*Dengke Zhao*<sup>a, \*</sup>, *Xiyun Zhang*<sup>e, \*</sup>, and *Nan Wang*<sup>e, \*</sup>

- a. School of Materials Science and Engineering, Henan Normal University, Xinxiang 453007, China.
- b. School of Chemistry, Sun Yat-sen University, Guangzhou, Guangdong 510275, China
- c. College of Environment and Energy, School of Environment and Energy, South China University of Technology, Guangzhou Higher Education Mega Center, Guangzhou 510006, China.
- d. Guangzhou Key Laboratory of Sensing Materials and Devices, Center for Advanced Analytical Science, School of Chemistry and Chemical Engineering, Guangzhou University, Guangzhou 510006, P.R. China.
- e. Siyuan laboratory, Guangzhou Key Laboratory of Vacuum Coating Technologies and New Energy Materials, Department of Physics, Jinan University, Guangzhou, Guangdong 510632, China.

E-mail: [scutezhao@sina.com](mailto:scutezhao@sina.com) (D. K. Zhao); [xiyunzhang@jnu.edu.cn](mailto:xiyunzhang@jnu.edu.cn) (X. Y. Zhang);  
[nanwang@jnu.edu.cn](mailto:nanwang@jnu.edu.cn) (N. Wang);

\* The corresponding author

# These authors contributed equally to this work.

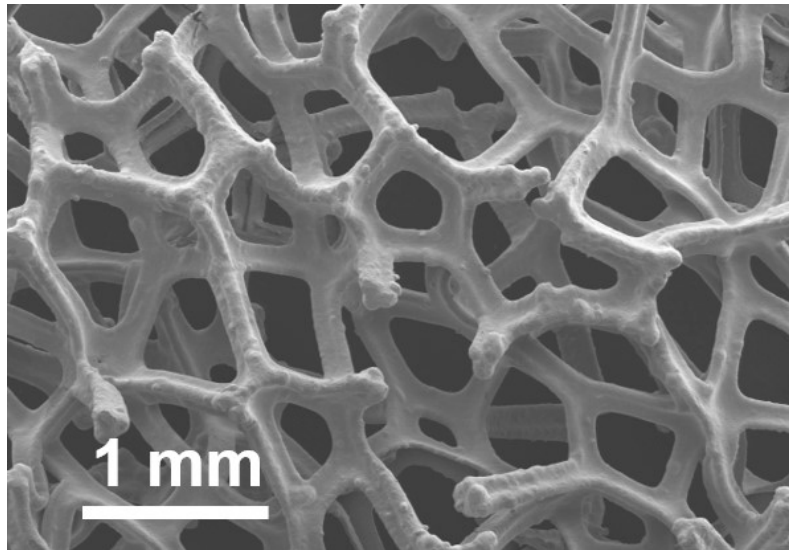

**Fig. S1.** SEM image of bare CF.

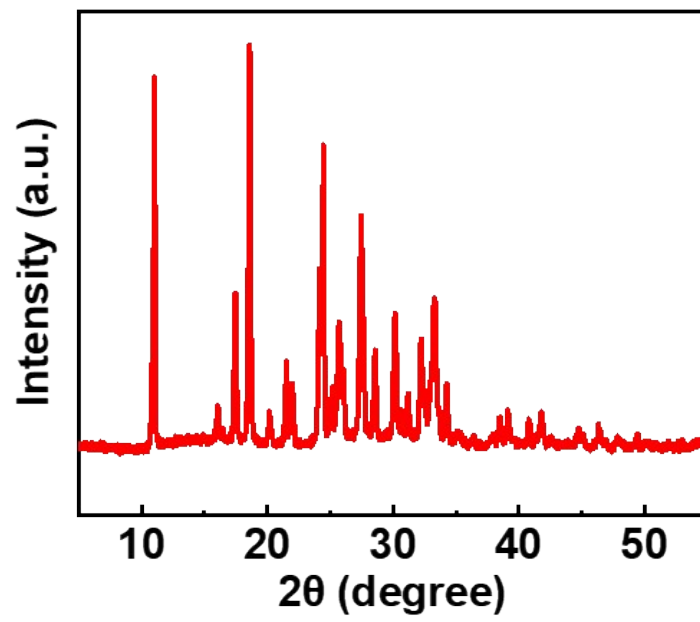

**Fig. S2.** XRD pattern of pure TCNQ.

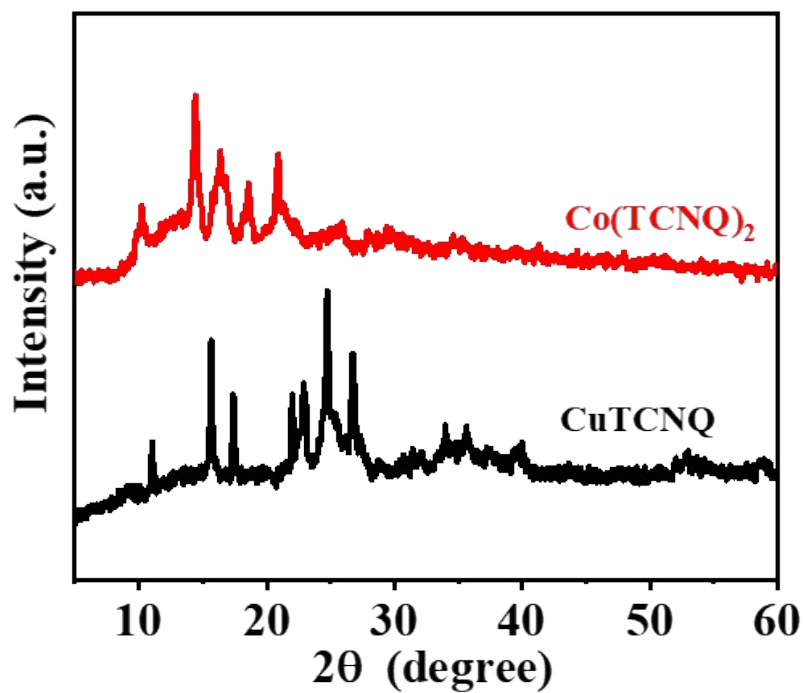

Fig. S3. XRD pattern of CuTCNQ and Co(TCNQ)<sub>2</sub>.

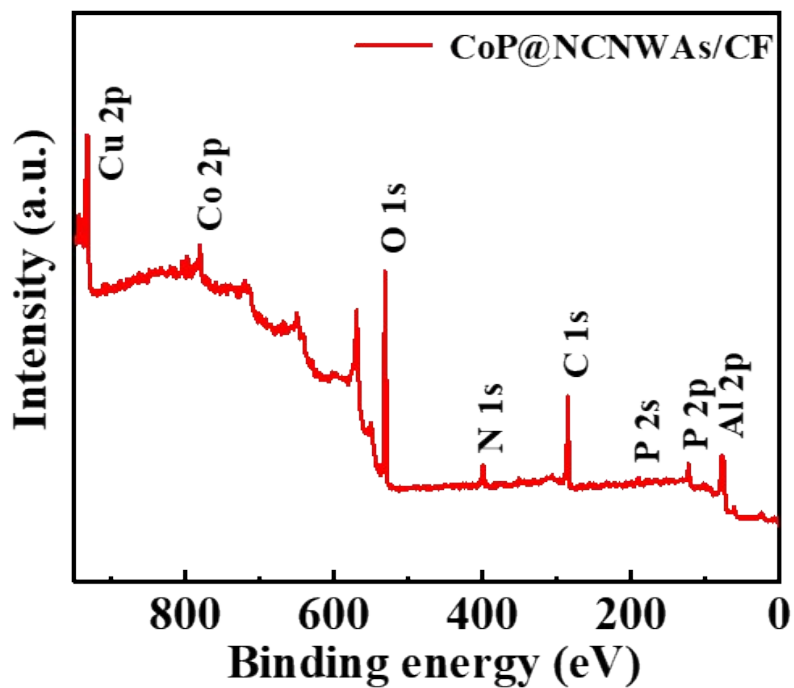

Fig. S4. The full XPS spectrum of CoP@NCNWAs/CF.

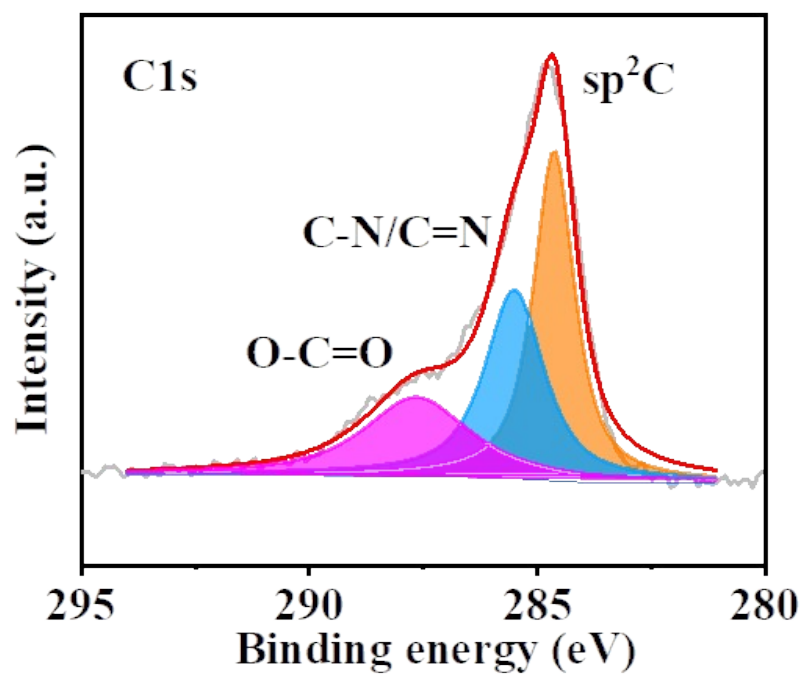

Fig. S5. The C1s spectrum of the CoP@NCNWAs.

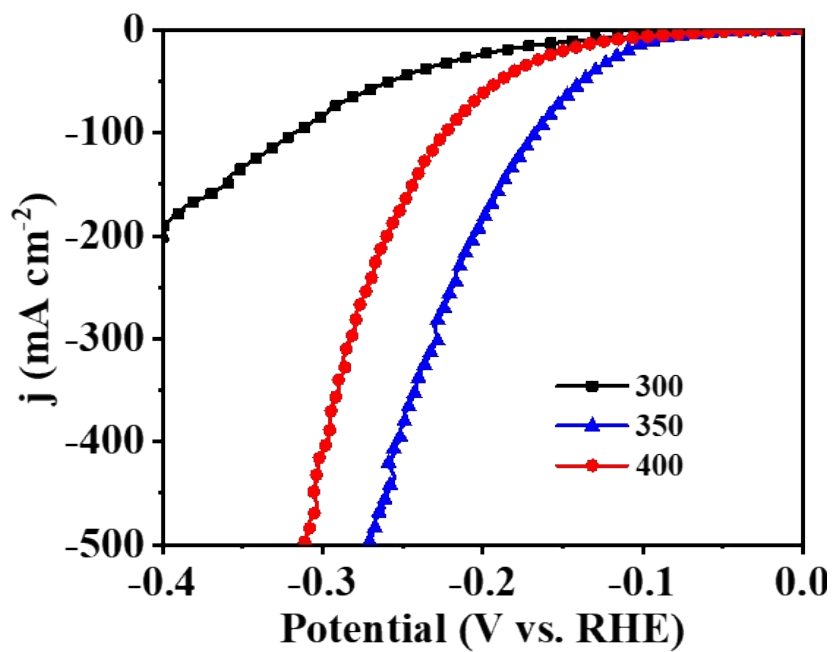

Fig. S6. The influence of the phosphidation temperatures on electrocatalytic HER performance.

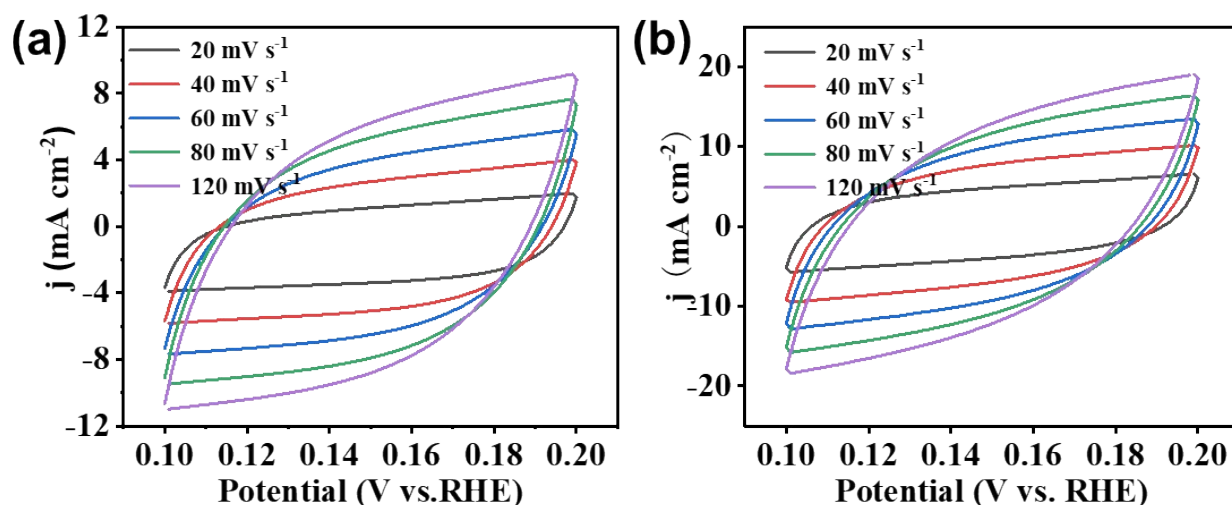

**Fig. S7.** (a, b) CV curves of CoP/CF and CoP@NCNWAs/CF between 0.1 and 0.2 V vs. RHE with different scan rate (20, 40, 60, 80 and 100 mV s<sup>-1</sup>).

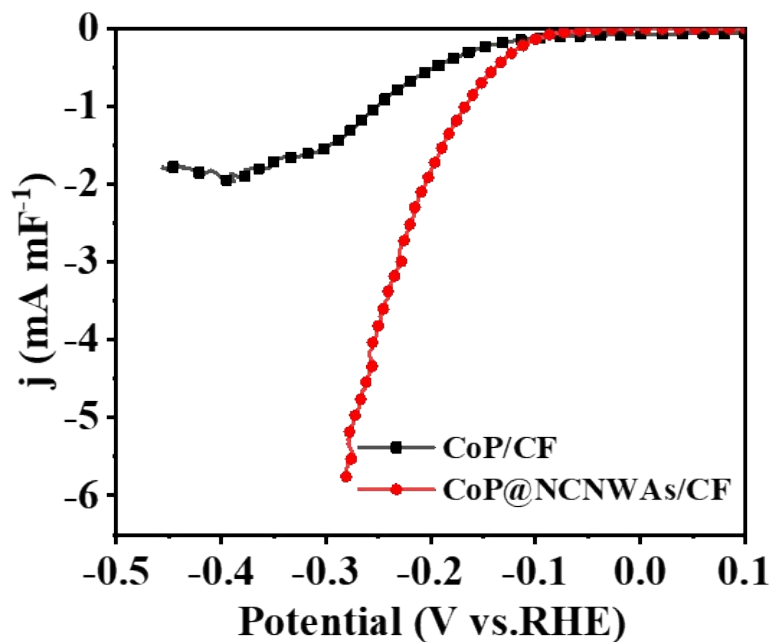

**Fig. S8.** The HER LSV normalized by ECSA.

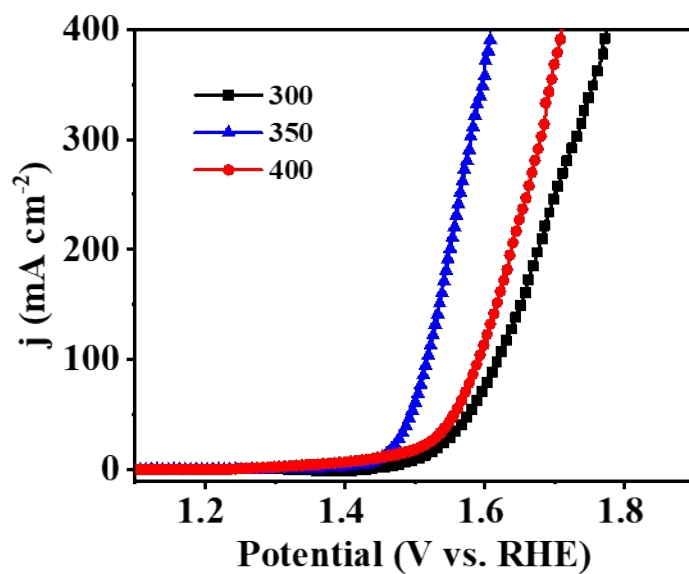

**Fig. S9.** The influence of the phosphidation temperatures on electrocatalytic HER performance.

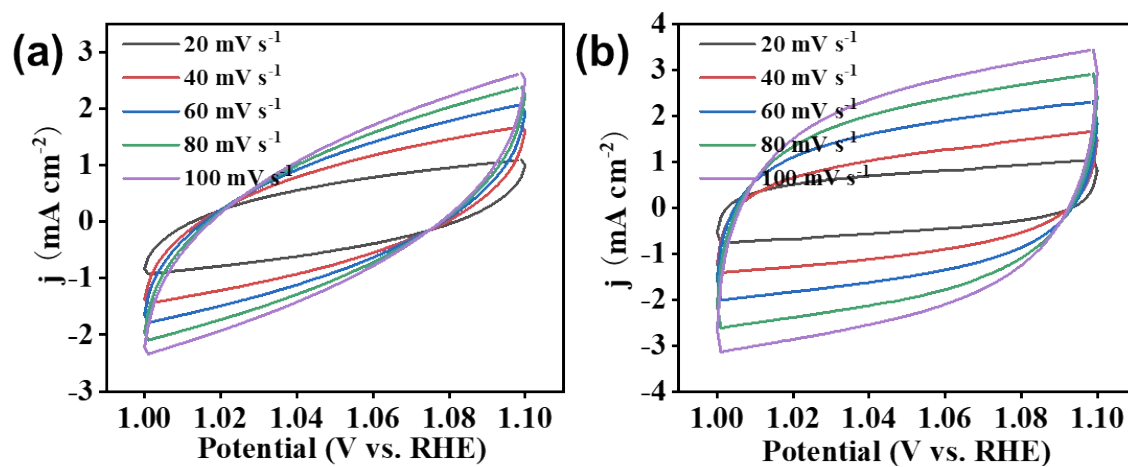

**Fig. S10.** CV curves of CoP/CF and CoP@NCNWAs/CF between 1.0 and 1.1 V vs. RHE with different scan rate (20, 40, 60, 80 and 100  $\text{mV s}^{-1}$ ).

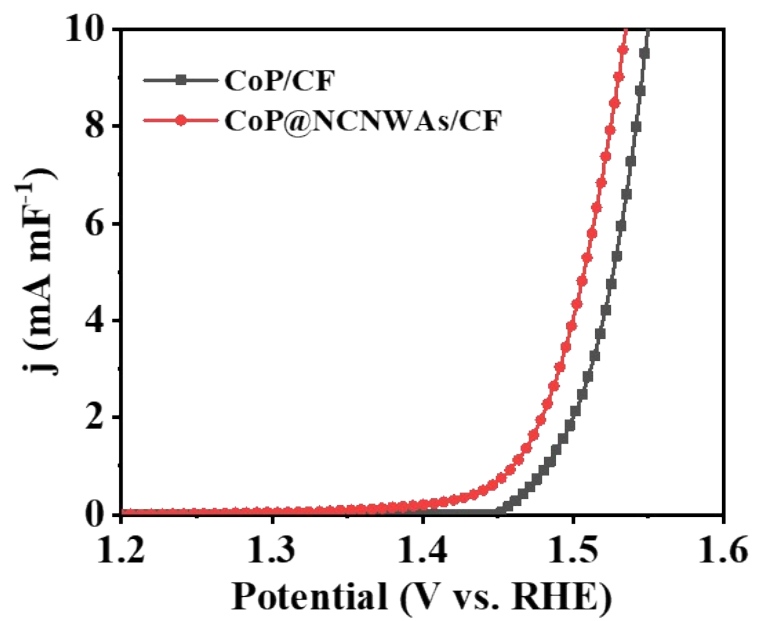

Fig. S11. The OER LSV normalized by ECSV.

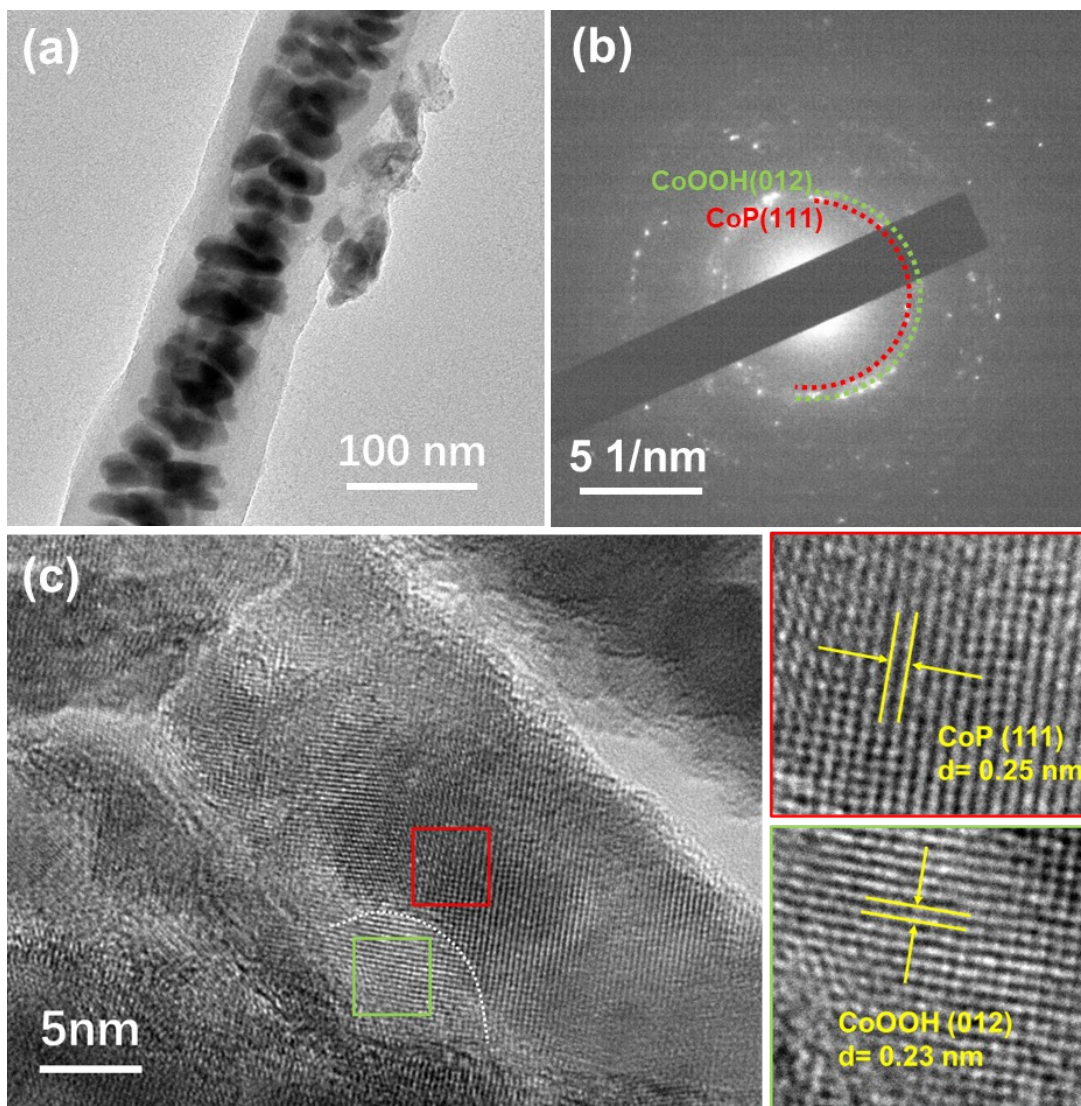

**Fig. S12.** (a) TEM, (b) the corresponding the SAED pattern and (c) HRTEM images of CoP@NCNWAs/NF after OER test.



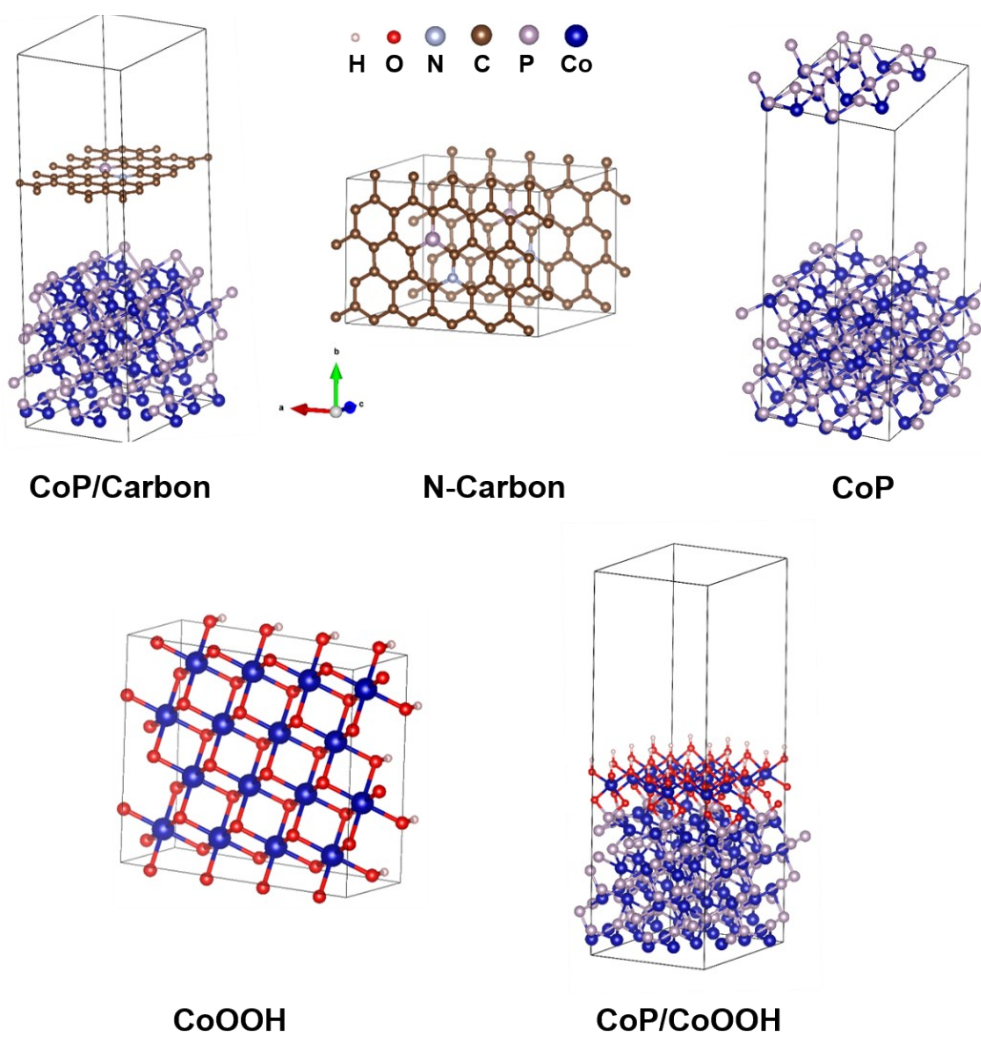

**Fig. S13.** Schematic illustration of the atomic structure of CoP, CoOOH, N-carbon, CoP/carbon interface and CoP/CoOOH interface.

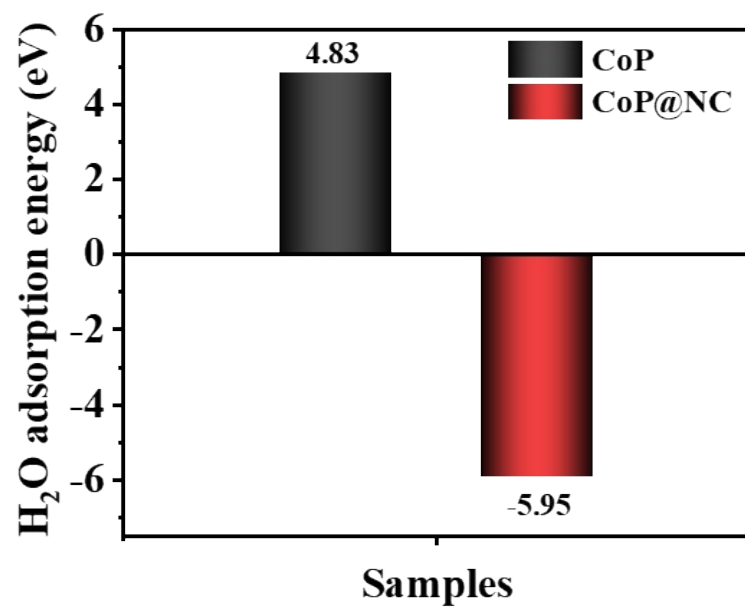

Fig. S14. H<sub>2</sub>O adsorption energy of CoP and CoP/NC

**Table S1.** The amount of all elements in the as-synthesized CoP@NCNWAs/CF

| <b>Element</b>        | <b>P</b> | <b>Co</b> |
|-----------------------|----------|-----------|
| <b>Content (wt.%)</b> | 18.32    | 36.73     |

**Table S2.** Comparison of HER performance of CoP@NCNWAs/CF with non-precious metal-based self-supported electrocatalysts reported recently in 1.0 M KOH.

| Electrocatalysts                                                    | $\eta@100 \text{ mA cm}^{-2}$<br>(mV) | Tafel slope<br>(mV dec <sup>-1</sup> ) | References                            |
|---------------------------------------------------------------------|---------------------------------------|----------------------------------------|---------------------------------------|
| Co <sub>4</sub> N-CeO <sub>2</sub> /GP <sup>1</sup>                 | 103                                   | 61                                     | Adv. Funct. Mater. 2020, 30, 1910596  |
| Ni <sub>3</sub> N-VN/NF <sup>2</sup>                                | 218                                   | 37                                     | Adv. Mater. 2019, 31, 1901174         |
| NiSe <sub>2</sub> /Ni <sub>3</sub> Se <sub>4</sub> /NF <sup>3</sup> | 228                                   | 69.7                                   | Appl. Catal., B. 2022, 303, 120915    |
| TMP NiZn-Ni/NF <sup>4</sup>                                         | 115                                   | 47.3                                   | Nano Energy, 2021, 89, 106402         |
| CoTeNR/NF <sup>5</sup>                                              | 340                                   | 115                                    | Small Methods, 2019, 3, 1900113       |
| Ni-Gr-CNTs-Ni <sub>2</sub> P <sup>6</sup>                           | 124                                   | 41                                     | ACS Nano 2021, 15, 5586-5599          |
| O, Mo-CoP/NF <sup>7</sup>                                           | 192                                   | 65.4                                   | ChemElectroChem, 2021, 8, 103-111     |
| Ni/Mo <sub>2</sub> C-NCSs <sup>8</sup>                              | 131                                   | 66                                     | Chem. Eng. J. 2022, 431, 134126       |
| CoS <sub>2</sub> /MoS <sub>2</sub> @CC <sup>9</sup>                 | 159                                   | 62.8                                   | ChemSusChem, 2020, 14, 699-708        |
| NF-Ni <sub>3</sub> S <sub>2</sub> /MnO <sub>2</sub> <sup>10</sup>   | 197                                   | 69                                     | Appl. Catal., B. 2019, 254, 329-338   |
| Co/CoMoN/NF <sup>11</sup>                                           | 173                                   | 68.9                                   | Adv. Sci. 2022, 2105313               |
| CrO <sub>x</sub> -Ni <sub>3</sub> N <sup>12</sup>                   | 220                                   | 73.4                                   | Small, 2022, 2106554                  |
| CFeCoNiP-NF <sup>13</sup>                                           | 150                                   | 31                                     | J. Mater. Chem. A, 2020, 8, 9939-9950 |
| NF@Mo-Ni <sub>0.85</sub> Se <sup>14</sup>                           | 260                                   | 98.98                                  | Chem. Eng. J. 2021, 422, 130125       |
| Ni-MoO <sub>2</sub> /NF-IH <sup>15</sup>                            | 204                                   | 75                                     | Adv. Funct. Mater. 2021, 31, 2009580  |
| <b>CoP@NCNWAs/CF</b>                                                | <b>166</b>                            | <b>43.46</b>                           | <b>This work</b>                      |

**Table S3.** Comparison of OER performance of CoP@NCNWAs/CF with non-precious metal-based self-supported electrocatalysts reported recently in 1.0 M KOH.

| Electrocatalysts                                                  | 100 mA cm <sup>-2</sup><br>(mV) | Tafel<br>slope<br>(mV dec <sup>-1</sup> ) | References                                  |
|-------------------------------------------------------------------|---------------------------------|-------------------------------------------|---------------------------------------------|
| CoP <sub>x</sub> @CNS <sup>16</sup>                               | 1.55                            | 70                                        | Angew. Chem. Int. Ed. 2020, 59, 21360-21366 |
| Ni <sub>2</sub> P-VP <sub>2</sub> /NF <sup>2</sup>                | 1.628                           | 49                                        | Adv. Mater. 2019, 31, 1901174               |
| Ce-m-Ni(OH) <sub>2</sub> @NiSe <sub>2</sub> <sup>17</sup>         | 1.47                            | 27                                        | Adv. Energy Mater. 2021, 11, 2101266        |
| a-LNFBPO <sup>18</sup>                                            | 1.525                           | 37                                        | Adv. Energy Mater. 2021, 11, 2100624        |
| Fe/Mo <sub>2</sub> C-NCSs <sup>8</sup>                            | 1.523                           | 83                                        | Chem. Eng. J. 2022, 431, 134126             |
| Co <sub>4</sub> N-CeO <sub>2</sub> /GP <sup>1</sup>               | 1.54                            | 37.1                                      | Adv. Funct. Mater. 2020, 30, 1910596        |
| N-Co <sub>3</sub> O <sub>4</sub> @C@NF <sup>19</sup>              | 1.62                            | 89                                        | Adv. Sci. 2019, 6, 1900272                  |
| CoS <sub>2</sub> /MoS <sub>2</sub> @CC <sup>9</sup>               | 1.57                            | 57.5                                      | ChemSusChem, 2020, 14, 699-708              |
| CoNi-HAB/Co(OH) <sub>2</sub> /CFP <sup>20</sup>                   | 1.62                            | 42                                        | Small, 2020, 16, 1907043                    |
| CoTeNR/NF <sup>5</sup>                                            | 1.58                            | 75                                        | Small Methods, 2019, 3, 1900113             |
| Vo <sub>x</sub> /Ni <sub>3</sub> S <sub>2</sub> @NF <sup>21</sup> | 1.588                           | 82                                        | J. Mater. Chem. A, 2019, 7, 10534-10542     |
| Co/CoMoN/NF <sup>11</sup>                                         | 1.533                           | 56                                        | Adv. Sci. 2022, 2105313                     |
| Co-CH@NiFe-LDH/NF <sup>22</sup>                                   | 1.462                           | 56                                        | Chem. Eng. J. 2021, 422, 130123             |
| FeNi-HDNAs <sup>23</sup>                                          | 1.53                            | 91.66                                     | Appl. Catal., B. 2020, 261, 118193          |
| Ni-Gr-CNTs-Ni <sub>2</sub> P <sup>6</sup>                         | 1.53                            | 42                                        | ACS Nano, 2021, 15, 5586-5599               |
| <b>CoP@NCNWAs/CF</b>                                              | <b>1.517</b>                    | <b>88.79</b>                              | <b>This work</b>                            |

## References

1. H. Sun, C. Tian, G. Fan, J. Qi, Z. Liu, Z. Yan, F. Cheng, J. Chen, C. P. Li and M. Du, *Boosting Activity on Co<sub>4</sub>N Porous Nanosheet by Coupling CeO<sub>2</sub> for Efficient Electrochemical Overall Water Splitting at High Current Densities*, *Adv. Funct. Mater.*, 2020, **30**.
2. H. Yan, Y. Xie, A. Wu, Z. Cai, L. Wang, C. Tian, X. Zhang and H. Fu, *Anion-Modulated HER and OER Activities of 3D Ni-V-Based Interstitial Compound Heterojunctions for High-Efficiency and Stable Overall Water Splitting*, *Adv. Mater.*, 2019, **31**, e1901174.
3. L. Tan, J. Yu, H. Wang, H. Gao, X. Liu, L. Wang, X. She and T. Zhan, *Controllable synthesis and phase-dependent catalytic performance of dual-phase nickel selenides on Ni foam for overall water splitting*, *Appl. Catal. B: Environ.*, 2022, **303**.
4. Q. Zhou, Q. Hao, Y. Li, J. Yu, C. Xu, H. Liu and S. Yan, *Free-standing trimodal porous NiZn intermetallic and Ni heterojunction as highly efficient hydrogen evolution electrocatalyst in the alkaline electrolyte*, *Nano Energy*, 2021, **89**.
5. L. Yang, H. Xu, H. Liu, D. Cheng and D. Cao, *Active Site Identification and Evaluation Criteria of In Situ Grown CoTe and NiTe Nanoarrays for Hydrogen Evolution and Oxygen Evolution Reactions*, *Small Methods*, 2019, **3**.
6. S. Riyajuddin, K. Azmi, M. Pahuja, S. Kumar, T. Maruyama, C. Bera and K. Ghosh, *Super-Hydrophilic Hierarchical Ni-Foam-Graphene-Carbon Nanotubes-Ni<sub>2</sub>P-Cu<sub>2</sub>P Nano-Architecture as Efficient Electrocatalyst for Overall Water Splitting*, *ACS Nano*, 2021, **15**, 5586-5599.
7. J. Mu, J. Xu, C. Zhou, Q. Wang, X. G. Wang, Z. Y. Liu, X. J. Zhao and E. C. Yang, *Self-Supported Oxygen and Molybdenum Dual-Doped Cobalt Phosphide Hierarchical Nanomaterials as Superior Bifunctional Electrocatalysts for Overall Water Splitting*, *ChemElectroChem*, 2020, **8**, 103-111.
8. Y. Xu, J. Yang, T. Liao, R. Ge, Y. Liu, J. Zhang, Y. Li, M. Zhu, S. Li and W. Li, *Bifunctional water splitting enhancement by manipulating Mo-H bonding energy of transition Metal-Mo<sub>2</sub>C heterostructure catalysts*, *Chem. Eng. J.*, 2022, **431**.
9. G. Zhou, X. Wu, M. Zhao, H. Pang, L. Xu, J. Yang and Y. Tang, *Interfacial Engineering-Triggered Bifunctionality of CoS<sub>2</sub>/MoS<sub>2</sub> Nanocubes/Nanosheet Arrays for High-Efficiency Overall Water Splitting*, *ChemSusChem*, 2021, **14**, 699-708.
10. Y. Xiong, L. Xu, C. Jin and Q. Sun, *Interface-engineered atomically thin Ni<sub>3</sub>S<sub>2</sub>/MnO<sub>2</sub> heterogeneous nanoarrays for efficient overall water splitting in alkaline media*, *Appl. Catal. B: Environ.*, 2019, **254**, 329-338.
11. H. Ma, Z. Chen, Z. Wang, C. V. Singh and Q. Jiang, *Interface Engineering of Co/CoMoN/NF Heterostructures for High-Performance Electrochemical Overall Water Splitting*, *Adv Sci (Weinh)*, 2022, DOI: 10.1002/advs.202105313, e2105313.
12. M. Yang, M. Zhao, J. Yuan, J. Luo, J. Zhang, Z. Lu, D. Chen, X. Fu, L. Wang and C. Liu, *Oxygen Vacancies and Interface Engineering on Amorphous/Crystalline CrOx-Ni<sub>3</sub>N Heterostructures toward High-Durability and Kinetically Accelerated Water Splitting*, *Small*, 2022, DOI: 10.1002/smll.202106554, e2106554.
13. F.-T. Tsai, Y.-T. Deng, C.-W. Pao, J.-L. Chen, J.-F. Lee, K.-T. Lai and W.-F. Liaw, *The HER/OER mechanistic study of an FeCoNi-based electrocatalyst for alkaline water splitting*, *J. Mater. Chem. A*, 2020, **8**, 9939-9950.
14. C. Yang, C. Wang, L. Zhou, W. Duan, Y. Song, F. Zhang, Y. Zhen, J. Zhang, W. Bao, Y. Lu, D. Wang and F. Fu, *Refining d-band center in Ni<sub>0.85</sub>Se by Mo doping: A strategy for boosting hydrogen generation via*

- coupling electrocatalytic oxidation 5-hydroxymethylfurfural*, *Chem. Eng. J.*, 2021, **422**.
15. G. Xiong, Y. Chen, Z. Zhou, F. Liu, X. Liu, L. Yang, Q. Liu, Y. Sang, H. Liu, X. Zhang, J. Jia and W. Zhou, *Rapid Synthesis of Various Electrocatalysts on Ni Foam Using a Universal and Facile Induction Heating Method for Efficient Water Splitting*, *Adv. Funct. Mater.*, 2021, **31**.
  16. C. C. Hou, L. Zou, Y. Wang and Q. Xu, *MOF-Mediated Fabrication of a Porous 3D Superstructure of Carbon Nanosheets Decorated with Ultrafine Cobalt Phosphide Nanoparticles for Efficient Electrocatalysis and Zinc-Air Batteries*, *Angew Chem Int Ed*, 2020, **59**, 21360-21366.
  17. S. F. Zai, X. Y. Gao, C. C. Yang and Q. Jiang, *Ce-Modified Ni(OH)<sub>2</sub> Nanoflowers Supported on NiSe<sub>2</sub> Octahedra Nanoparticles as High-Efficient Oxygen Evolution Electrocatalyst*, *Adv. Energy Mater.*, 2021, **11**.
  18. J. Kwon, H. Han, S. Jo, S. Choi, K. Y. Chung, G. Ali, K. Park, U. Paik and T. Song, *Amorphous Nickel-Iron Borophosphate for a Robust and Efficient Oxygen Evolution Reaction*, *Adv. Energy Mater.*, 2021, **11**.
  19. Y. Ha, L. Shi, Z. Chen and R. Wu, *Phase-Transited Lysozyme-Driven Formation of Self-Supported Co<sub>3</sub>O<sub>4</sub>@C Nanomeshes for Overall Water Splitting*, *Adv Sci (Weinh)*, 2019, **6**, 1900272.
  20. C. Li, Y. Gao, X. Xia, J. Zhu, X. Wang and Y. Fu, *Hierarchically Structured Two-Dimensional Bimetallic CoNi-Hexaaminobenzene Coordination Polymers Derived from Co(OH)<sub>2</sub> for Enhanced Oxygen Evolution Catalysis*, *Small*, 2020, **16**, e1907043.
  21. Y. Niu, W. Li, X. Wu, B. Feng, Y. Yu, W. Hu and C. M. Li, *Amorphous nickel sulfide nanosheets with embedded vanadium oxide nanocrystals on nickel foam for efficient electrochemical water oxidation*, *J. Mater. Chem. A*, 2019, **7**, 10534-10542.
  22. S. Cao, H. Huang, K. Shi, L. Wei, N. You, X. Fan, Z. Yang and W. Zhang, *Engineering superhydrophilic/superaerophobic hierarchical structures of Co-CH@NiFe-LDH/NF to boost the oxygen evolution reaction*, *Chem. Eng. J.*, 2021, **422**.
  23. N. Yu, W. Cao, M. Huttula, Y. Kayser, P. Hoenicke, B. Beckhoff, F. Lai, R. Dong, H. Sun and B. Geng, *Fabrication of FeNi hydroxides double-shell nanotube arrays with enhanced performance for oxygen evolution reaction*, *Appl. Catal. B: Environ.*, 2020, **261**.
